# Supplementary material
Source: PubMed Central journal article supplement (PMC5824301)

## Supplementary Online Content

Tasche KK, Buchakjian MR, Pagedar NA, Sperry SM. Definition of “Close Margin” in Oral Cancer Surgery and Relationship of Different Margins to Local Recurrence Rates. *JAMA Otolaryngol Head Neck Surg*. Published online April 26, 2017. doi:10.1001/jamaoto.2017.0548

**eTable 1.** Local recurrence rate by successful intraoperative additional tissue excision

**eTable 2.** Local recurrence rate by adjuvant radiation treatment

**eTable 3.** Literature review of local recurrence and survival based on margin

**eTable 4.** Local recurrence based on margin distance, stratified by use of adjuvant radiation

**eFigure.** Local recurrence based on margin distance, stratified by use of adjuvant radiation

This supplementary material has been provided by the authors to give readers additional information about their work.

eTable 1 – Local recurrence rate by successful intraoperative additional tissue excision

| Specimen Margin | N                  | Successful additional tissue excision |                    |
|-----------------|--------------------|---------------------------------------|--------------------|
|                 |                    | Yes                                   | No                 |
| Positive        | 25:56 <sup>a</sup> | 0.6 (0.41 – 0.77) <sup>b</sup>        | 0.38 (0.26 – 0.51) |
| <1 mm           | 12:42              | 0.25 (0.09 – 0.53)                    | 0.29 (0.17 – 0.44) |
| 1-5 mm          | 28:97              | 0.14 (0.06 – 0.31)                    | 0.14 (0.09 – 0.23) |
| >=5 mm          | 8:86               | 0.25 (0.07 – 0.59)                    | 0.09 (0.05 – 0.17) |

Abbreviations: LR, local recurrence; N, the number of non-missing values;

<sup>a</sup> Number of ‘Yes’ : Number of ‘No’

<sup>b</sup> Rate (95% confidence interval)

eTable 2 – Local recurrence rate by adjuvant radiation treatment

| Specimen Margin | N                  | Adjuvant radiation              |                    |
|-----------------|--------------------|---------------------------------|--------------------|
|                 |                    | Yes                             | No                 |
| Positive        | 38:43 <sup>a</sup> | 0.53 (0.37 – 0.68) <sup>b</sup> | 0.37 (0.24 – 0.52) |
| <1 mm           | 29:25              | 0.28 (0.15 – 0.46)              | 0.28 (0.14 – 0.48) |
| 1-5 mm          | 45:80              | 0.13 (0.06 – 0.26)              | 0.15 (0.09 – 0.24) |
| >=5 mm          | 24:70              | 0.21 (0.09 – 0.40)              | 0.07 (0.03 – 0.16) |

Abbreviations: LR, local recurrence; N, the number of non-missing values;

<sup>a</sup> Number of ‘Yes’ : Number of ‘No’

<sup>b</sup> Rate (95% confidence interval)

eTable 3 – Literature review of local recurrence and survival based on margin

| Author, year | N   | Site                          | T stage | Definition of margins                                                     | Therapy                            | LR for positive/close margins                                     | LR for negative margins                                       | Survival, positive margins                                                           | Survival, negative margins                              |
|--------------|-----|-------------------------------|---------|---------------------------------------------------------------------------|------------------------------------|-------------------------------------------------------------------|---------------------------------------------------------------|--------------------------------------------------------------------------------------|---------------------------------------------------------|
| Looser, 1976 | 62  | All except glottis, cutaneous | All     | Pos = dysplasia /CIS or cancer at margin;<br>Close = <5 mm<br>Neg = ≥5 mm | Primary surgery                    | 71%                                                               | 31.7%                                                         | 5 yr OS<br>30.6%                                                                     | 5 yr OS<br>35.9%                                        |
| Byers, 1978  | 216 | All sites                     | All     | Pos = CIS or cancer at margin                                             | Primary surgery                    | 80%                                                               | 16%                                                           | 2 yr OS<br>5%                                                                        | 2 yr OS<br>66%                                          |
| Vikram, 1984 | 107 | All                           | All     | Pos = cancer at margin;<br>Close = <5 mm;<br>Neg = ≥5 mm                  | Primary surgery + adjuvant RT      | Pos = 11%<br>Close = 4%                                           | 2%                                                            | NA                                                                                   | NA                                                      |
| Scholl, 1986 | 214 | Tongue                        | All     | Pos = cancer at margin<br>Neg = all others                                | Primary + salvage surgery included | Small number; did not look at positive margin as a separate group | Neg = 13%<br>Neg after add'l resection = 22%<br>Overall = 15% | Small number with poor survival; did not look at positive margin as a separate group | 5 yr OS<br>Neg = 49%<br>Neg after add'l resection = 31% |
| Loree, 1990  | 398 | Oral cavity,                  | All     | Pos = cancer at                                                           | Primary surgery                    | Pos = 36%                                                         | 18%                                                           | 5 yr: Pos =                                                                          | 5 yr OS:                                                |

|                   |         |                                   |     |                                                                                                 |                                                                                                             |                                                                                                                                            |       |                                                                 |                      |
|-------------------|---------|-----------------------------------|-----|-------------------------------------------------------------------------------------------------|-------------------------------------------------------------------------------------------------------------|--------------------------------------------------------------------------------------------------------------------------------------------|-------|-----------------------------------------------------------------|----------------------|
|                   |         | no lip                            |     | margin<br>Close =<br><5 mm<br>Neg = ≥5<br>mm                                                    | ±<br>adjuvan<br>t RT                                                                                        | Close =<br>35%<br>Dysplasi<br>a = 33%<br>CIS =<br>44%                                                                                      |       | 43%<br>Close<br>= 51%<br>Dyspl<br>asia =<br>94%<br>CIS =<br>71% | Neg =<br>60%         |
| Ravas<br>z, 1991  | 80      | All<br>except<br>lip              | All | Pos =<br>cancer at<br>margin<br>Close =<br><5 mm<br>CIS =<br>CIS at<br>margin<br>Neg = ≥5<br>mm | Primary<br>surgery<br>+<br>adjuvan<br>t RT                                                                  | Pos =<br>31% <sup>a</sup><br>Close =<br>29%<br>CIS =<br>14%                                                                                | 12.5% | NA                                                              | NA                   |
| Yuen,<br>1998     | 50      | Oral<br>tongue                    | All | Pos =<br>cancer at<br>margin<br>Close =<br><10 mm                                               | Primary<br>surgery<br>+<br>salvage<br>surgery<br>after<br>RT<br>failure<br>(n = 5);<br>±<br>adjuvan<br>t RT | 0 mm = 29%<br>1 mm = 25%<br>2 mm = 13%<br>3 mm = 0%<br>4 mm = 14%<br>5 mm = 13%<br>6 mm = 0%<br>8 mm = 0 %<br>10 mm = 50%<br>Overall = 16% | NA    |                                                                 |                      |
| Woolga<br>r, 1999 | 20<br>0 | Oral<br>cavity,<br>orophar<br>ynx | All | Pos =<br>cancer at<br>margin<br>Close =<br><5 mm<br>Neg = ≥5<br>mm                              | Primary<br>surgery<br>±<br>adjuvan<br>t RT                                                                  | NA                                                                                                                                         | NA    | OS<br>Pos =<br>11.1%<br>Close<br>=<br>35.7%                     | OS<br>Neg =<br>62.6% |
| Spiro,<br>1999    | 14<br>6 | Oral<br>tongue                    | All | Pos =<br>cancer at<br>margin<br>Close =<br>within 1<br>HPF<br>Neg = ≥1<br>HPF                   | Primary<br>surgery<br>±<br>adjuvan<br>t RT                                                                  | Pos = 36%<br>Not<br>specified<br>for close                                                                                                 | 12%   | 5 yr OS =<br>~60% for all<br>groups                             |                      |
| Sutton,           | 20      | Oral                              | All | Pos =                                                                                           | Primary                                                                                                     | Pos = 55%                                                                                                                                  | 12%   | OS                                                              | OS                   |

|                         |     |                    |     |                                                                                                |                                           |                                                |                                              |                                                                                                      |                               |
|-------------------------|-----|--------------------|-----|------------------------------------------------------------------------------------------------|-------------------------------------------|------------------------------------------------|----------------------------------------------|------------------------------------------------------------------------------------------------------|-------------------------------|
| 2003                    | 0   | cavity, oropharynx |     | cancer at margin; Close = <5 mm<br>Neg = ≥5 mm                                                 | surgery ± adjuvant RT                     | Close = 33%                                    |                                              | Pos = 11%<br>Close = 36%                                                                             | 60%                           |
| Brandwein-Geisler, 2005 | 168 | All                | All | Pos = cancer at margin; Close = <5 mm (additional resection if on frozen <5mm);<br>Neg = ≥5 mm | Primary surgery and neoadjuvant therapies | Pos = 26%<br>Close = 13%                       | Neg = 20%<br>Neg after add'l resection = 26% | NA                                                                                                   | NA                            |
| Nason, 2009             | 277 | Oral cavity        | All | Pos = cancer at margin; Close = <5 mm; Neg = ≥5 mm                                             | Primary surgery ± adjuvant RT             | Pos = 26.2%<br>≤2 mm = 22.5%<br>3-4 mm = 14.6% | 8.4%                                         | Pos DFS = 48.3%<br>OS = 38.6%<br>≤2 mm DFS = 48.5%<br>OS = 62.6%<br>3-4 mm DFS = 69.5%<br>OS = 69.6% | Neg DFS = 72.9%<br>OS = 70.5% |
| Kurita, 2010            | 148 | Oral cavity        | All | Pos = cancer at margin; Close = <5 mm; Dysplasia = dysplasia at margin                         | Primary surgery ± adjuvant RT             | Pos = 56%<br>Close = 24%<br>Dysp = 23%         | 9%                                           | NA                                                                                                   | NA                            |

|                 |     |                                                                            |     |                                                                    |                                        |                                                                                                                           |                                                 |                                                                                                         |                                                                                        |
|-----------------|-----|----------------------------------------------------------------------------|-----|--------------------------------------------------------------------|----------------------------------------|---------------------------------------------------------------------------------------------------------------------------|-------------------------------------------------|---------------------------------------------------------------------------------------------------------|----------------------------------------------------------------------------------------|
|                 |     |                                                                            |     | though no cancer within 5 mm of margin<br>Neg = $\geq 5$ mm        |                                        |                                                                                                                           |                                                 |                                                                                                         |                                                                                        |
| Wong, 2012      | 192 | Oral cavity, oropharynx                                                    | All | Pos = $< 1$ mm <sup>b</sup><br>Close = 1-5 mm<br>Neg = $> 5$ mm    | Primary surgery $\pm$ adjuvant therapy | Pos = 26%<br>Close = 11%                                                                                                  | 10%                                             | OS <sup>b</sup> 39%<br>DSS 23%                                                                          | OS <sup>b</sup> 32%<br>DSS 17%                                                         |
| Ch'ng, 2013     | 144 | Oral cavity                                                                | All | Close = $< 5$ mm (did not include positive or margins $\geq 5$ mm) | Primary surgery only                   | Local control rate (5 year)<br>$\leq 1$ mm = 91.7%<br>1-2 mm = 88.8%<br>2-3 mm = 90.4%<br>3-4 mm = 97.5%<br>4-5 mm = 100% |                                                 | DSS (5 year)<br>$\leq 1$ mm = 93.6%<br>1-2 mm = 88.5%<br>2-3 mm = 79.6%<br>3-4 mm = 73%<br>4-5 mm = 50% |                                                                                        |
| Varvarens, 2015 | 108 | Oral cavity, including mucosquamous carcinoma and adenoid cystic carcinoma | All | Pos = cancer at margin<br>Close = $< 5$ mm<br>Neg = $\geq 5$ mm    | Primary and salvage surgery            | Pos = 8.3%<br>Close = 26.4%                                                                                               | Neg = 3.4%<br>Neg after add'l resection = 28.6% | Pos: 5 yr OS = 41.7%<br>DFS = 66.7%<br>Close: OS = 58.2%<br>DFS = 56.6%                                 | Neg: OS = 81.3%<br>DFS = 86.2%<br>Neg after add'l resection: OS = 56.2%<br>DFS = 57.1% |

Abbreviations: OS = overall survival; DSS = disease-specific survival; DFS = disease-free survival; LFRS = local recurrence-free survival

<sup>a</sup>Included both local and regional recurrence

<sup>b</sup>Used cutoff of  $\leq 1.6$  mm to define positive and  $> 1.6$  mm to define negative based on ROC curve for survival data

eFigure. Local recurrence based on margin distance, stratified by use of adjuvant radiation.

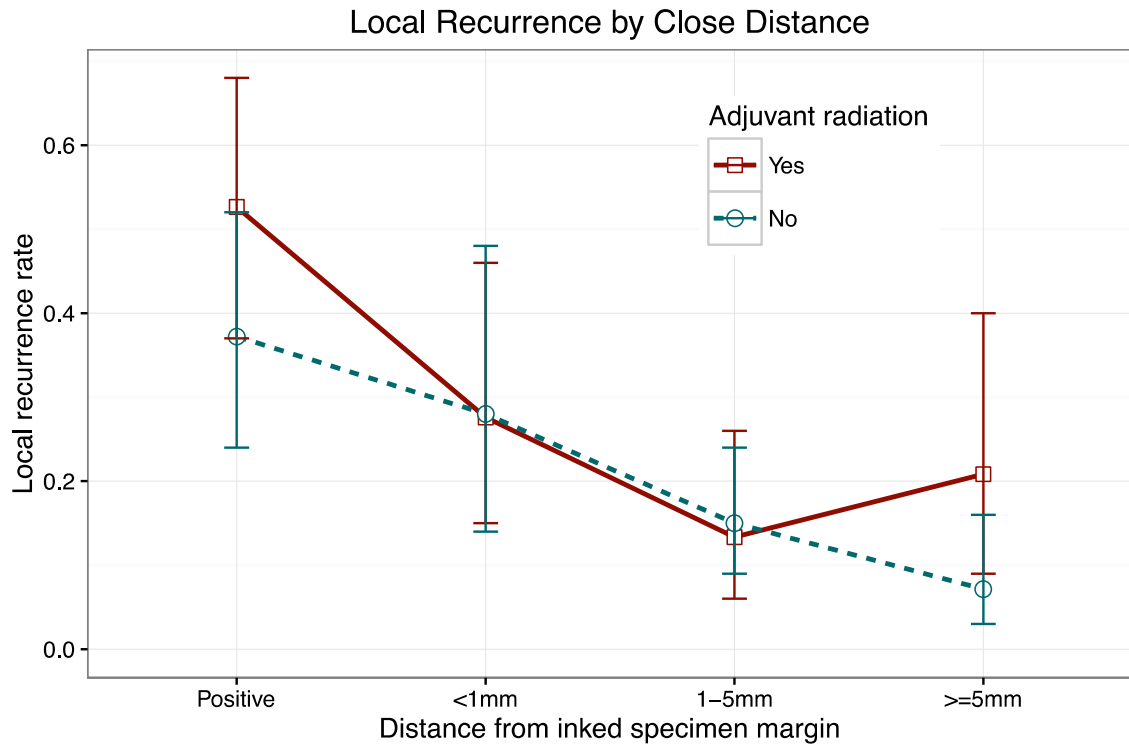

Supplement: jamaotolaryngolheadnecksurg-143-1166-s001.pdf [file jamaotolaryngolheadnecksurg-143-1166-s001.pdf]
